# Supplementary material for: The Impact of Heatwaves on Mortality and Morbidity and the Associated Vulnerability Factors: A Systematic Review
Source: MDPI journal article supplement (doi:10.3390/ijerph192316356), 2022-12-06
Supplement: s1 [file s1]

**Table S1.** Keywords search used in the screening process.

| Database       | Search String                                                                                                                                                                                                                                                                                                                                                                                                                |
|----------------|------------------------------------------------------------------------------------------------------------------------------------------------------------------------------------------------------------------------------------------------------------------------------------------------------------------------------------------------------------------------------------------------------------------------------|
| Scopus         | TITLE-ABS-KEY ((heatwave* OR heat*) AND (vulnerable* OR sensitivity OR susceptible* OR exposed OR disadvantage* OR risk*) AND (mortality OR death* OR fatal* OR lethal* OR morbidity OR “heat-related illness*” OR “hospital admission*” OR “heat stress*” OR “cardiovascular*” OR “respiratory*” OR asthma OR “chronic obstructive pulmonary disease*” OR “renal*” OR “mental*” OR “ambulance*” OR “emergency department”)) |
| Web of Science | TS=((heatwave* OR heat*) AND (vulnerable* OR sensitivity OR susceptible* OR exposed OR disadvantage* OR risk*) AND (mortality OR death* OR fatal* OR lethal* OR morbidity OR “heat-related illness*” OR “hospital admission*” OR “heat stress*” OR “cardiovascular*” OR “respiratory*” OR asthma OR “chronic obstructive pulmonary disease*” OR “renal*” OR “mental*” OR “ambulance*” OR “emergency department”))            |
| EBSCOhost      | ((heatwave* OR heat*) AND (vulnerable* OR sensitivity OR susceptible* OR exposed OR disadvantage* OR risk*) AND (mortality OR death* OR fatal* OR lethal* OR morbidity OR “heat-related illness*” OR “hospital admission*” OR “heat stress*” OR “cardiovascular*” OR “respiratory*” OR asthma OR “chronic obstructive pulmonary disease*” OR “renal*” OR “mental*” OR “ambulance*” OR “emergency department”))               |
| PubMed         | ((heatwave* OR heat*) AND (vulnerable* OR sensitivity OR susceptible* OR exposed OR disadvantage* OR risk*) AND (mortality OR death* OR fatal* OR lethal* OR morbidity OR “heat-related illness*” OR “hospital admission*” OR “heat stress*” OR “cardiovascular*” OR “respiratory*” OR asthma OR “chronic obstructive pulmonary disease*” OR “renal*” OR “mental*” OR “ambulance*” OR “emergency department”))               |

**Table S2.** Navigation Guide Systematic Review Ratings of Each Study.

| No  | Study                   | Recruitment  | Blinding | Exposure Assessment | Outcome Assessment | Confounding  | Incomplete Outcome Data | Selective Reporting | Conflicts of Interest | Other Bias | Overall Risk of Bias |
|-----|-------------------------|--------------|----------|---------------------|--------------------|--------------|-------------------------|---------------------|-----------------------|------------|----------------------|
| 1.  | Lin et al. 2012         | Low          | Low      | Low                 | Low                | Low          | Low                     | Low                 | Low                   | Low        | Low                  |
| 2.  | Ahmadnezhad et al. 2013 | Low          | Low      | Low                 | Low                | Low          | Low                     | Low                 | Low                   | Low        | Low                  |
| 3.  | Toloo et al. 2014       | Low          | Low      | Low                 | Low                | Low          | Probably Low            | Low                 | Low                   | Low        | Low                  |
| 4.  | Wang et al. 2015        | Low          | Low      | Probably Low        | Low                | Low          | Low                     | Low                 | Low                   | Low        | Low                  |
| 5.  | Tong et al. 2015        | Low          | Low      | Low                 | Low                | Low          | Low                     | Low                 | Low                   | Low        | Low                  |
| 6.  | Green et al. 2016       | Probably Low | Low      | Probably Low        | Low                | Probably Low | Probably Low            | Low                 | Low                   | Low        | Probably Low         |
| 7.  | Soneja et al. 2016      | Low          | Low      | Low                 | Low                | Low          | Low                     | Probably Low        | Low                   | Low        | Low                  |
| 8.  | Kang et al. 2016        | Low          | Low      | Low                 | Low                | Low          | Low                     | Low                 | Low                   | Low        | Low                  |
| 9.  | Phung et al. 2017       | Low          | Low      | Low                 | Low                | Low          | Low                     | Low                 | Low                   | Low        | Low                  |
| 10. | Xu et al. 2017          | Low          | Low      | Low                 | Low                | Probably Low | Low                     | Low                 | Low                   | Low        | Low                  |
| 11. | Li et al. 2017          | Probably Low | Low      | Low                 | Low                | Probably Low | Low                     | Low                 | Low                   | Low        | Low                  |
| 12. | Borg et al. 2018        | Low          | Low      | Probably Low        | Low                | Probably Low | Low                     | Low                 | Low                   | Low        | Low                  |
| 13. | Cheng et al. 2018       | Low          | Low      | Low                 | Low                | Probably Low | Low                     | Low                 | Low                   | Low        | Low                  |
| 14. | Yin et al. 2018         | Low          | Low      | High                | Low                | Probably Low | Probably Low            | Low                 | Low                   | Low        | Low                  |
| 15. | Huang et al. 2018       | Low          | Low      | Low                 | Low                | Low          | Low                     | Low                 | Low                   | Low        | Low                  |
| 16. | Zhang et al. 2018       | Low          | Low      | Probably Low        | Low                | Probably Low | Probably Low            | Low                 | Low                   | Low        | Probably Low         |
| 17. | Campbell et al. 2019    | Low          | Low      | Low                 | Low                | Low          | Probably Low            | Low                 | Low                   | Low        | Low                  |
| 18. | Li et al. 2019          | Low          | Low      | Low                 | Low                | Low          | Probably Low            | Probably Low        | Low                   | Low        | Low                  |
| 19. | Xu et al. 2019          | Low          | Low      | Low                 | Low                | Probably Low | Probably Low            | Probably Low        | Low                   | Low        | Probably Low         |
| 20. | Patel et al. 2019       | Low          | Low      | Low                 | Low                | Low          | Low                     | Low                 | Low                   | Low        | Low                  |
| 21. | Zhao et al. 2019        | Low          | Low      | Low                 | Low                | Low          | Probably Low            | Low                 | Low                   | Low        | Low                  |
| 22. | Xu et al. 2019          | Low          | Low      | Low                 | Low                | Low          | Low                     | Low                 | Low                   | Low        | Low                  |
| 23. | Liss et al. 2019        | Low          | Low      | Probably Low        | Low                | Probably Low | Probably Low            | Low                 | Low                   | Low        | Probably Low         |
| 24. | Patel et al. 2019       | Low          | Low      | Low                 | Low                | Low          | Low                     | Low                 | Low                   | Low        | Low                  |

|     |                        |     |     |              |     |              |              |     |     |     |     |
|-----|------------------------|-----|-----|--------------|-----|--------------|--------------|-----|-----|-----|-----|
| 25. | Kim et al. 2020        | Low | Low | Probably Low | Low | Probably Low | Low          | Low | Low | Low | Low |
| 26. | Kang et al. 2020       | Low | Low | Probably Low | Low | Low          | Low          | Low | Low | Low | Low |
| 27. | Sohail et al. 2020     | Low | Low | Low          | Low | Probably Low | Probably Low | Low | Low | Low | Low |
| 28. | Campbell et al. 2021   | Low | Low | Low          | Low | Probably Low | Probably Low | Low | Low | Low | Low |
| 29. | Kollanus et al. 2021   | Low | Low | Probably Low | Low | Probably Low | Low          | Low | Low | Low | Low |
| 30. | Wondmagegn et al. 2021 | Low | Low | Probably Low | Low | Probably Low | Low          | Low | Low | Low | Low |
| 31. | Thompson et al. 2022   | Low | Low | Low          | Low | Probably Low | Low          | Low | Low | Low | Low |
| 32. | Graczyk et al. 2022    | Low | Low | Low          | Low | Probably Low | Low          | Low | Low | Low | Low |

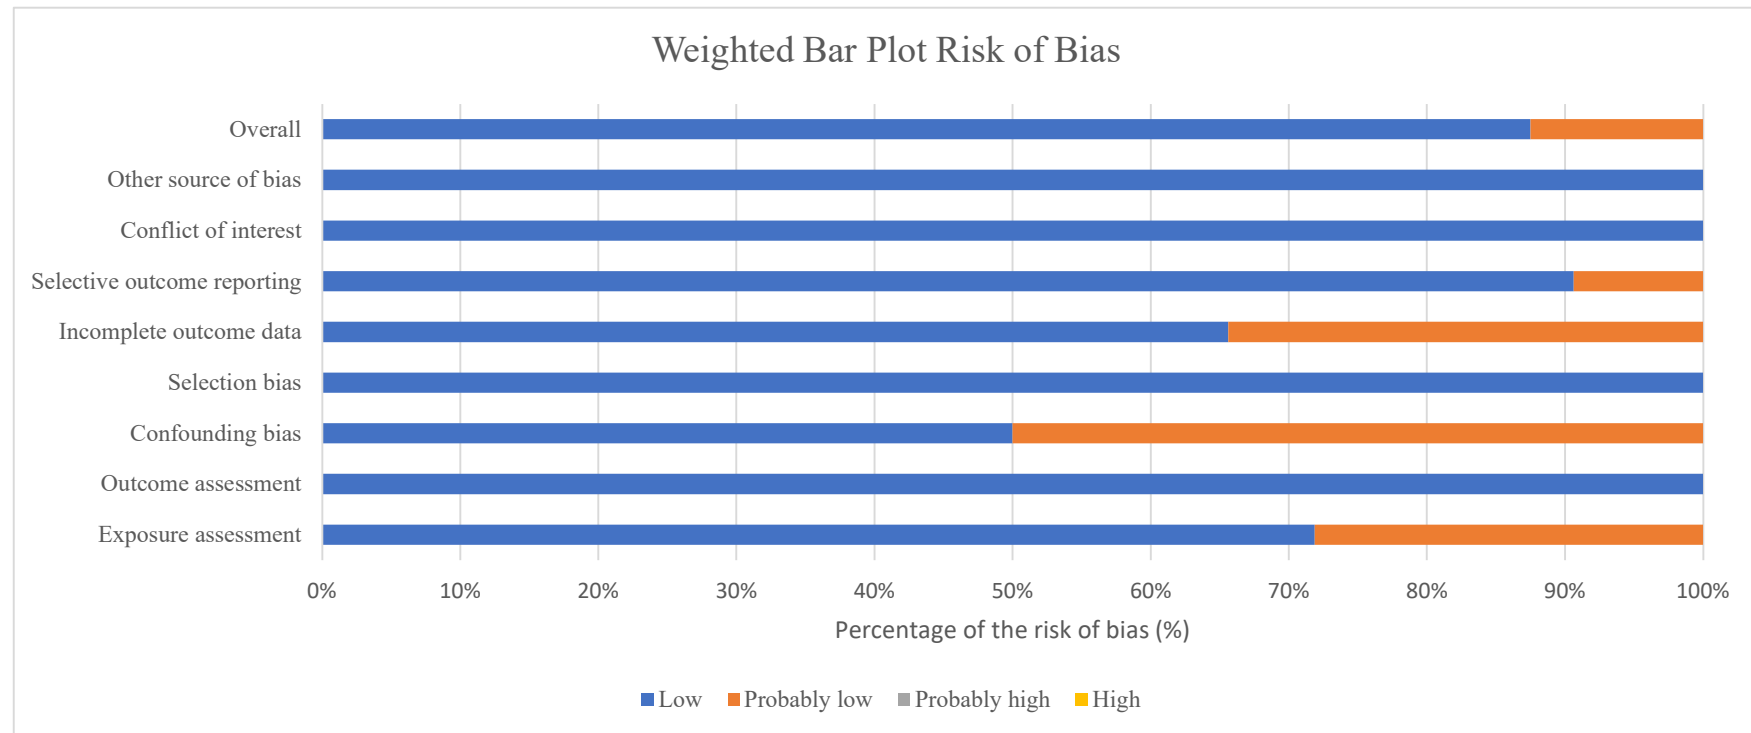

**Figure S1.** Weighted bar plots indicating percentage of the risk of bias judgments within each bias domain across reviewed studies (n = 32).
